# Supplementary material for: Bio-Stimulating Effect of Natural Polysaccharides from Lobularia maritima on Durum Wheat Seedlings: Improved Plant Growth, Salt Stress Tolerance by Modulating Biochemical Responses and Ion Homeostasis
Source: MDPI journal article supplement (doi:10.3390/plants11151991), 2022-07-30
Supplement: s1 [file s1]

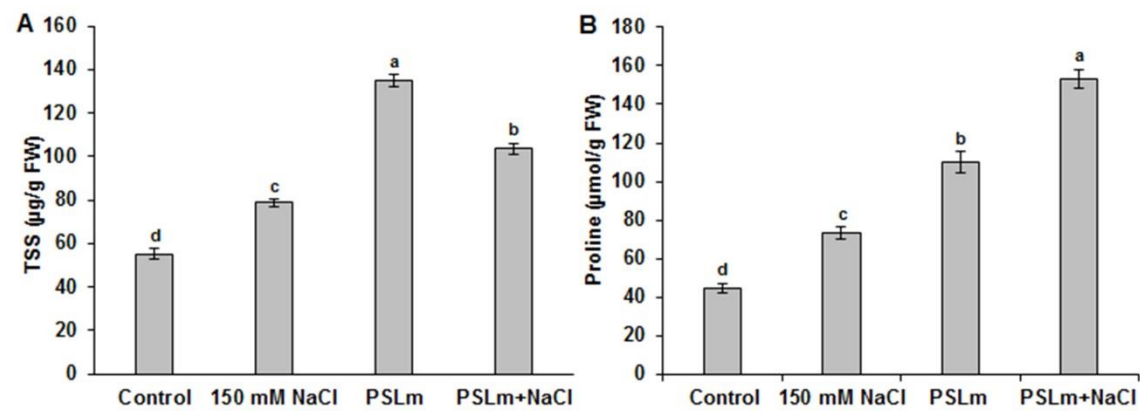

**Figure S1.** Effect of salt stress (150 mM NaCl) on total soluble sugars content (A) and proline content (B) of wheat seedlings in half-strength MS medium supplemented with (2 mg/mL) or without PSLm extract. Values are means  $\pm$  SE of three replicates. Different letters indicate significant differences at  $P < 0.05$ .

**Table S1.** Sequences of primers used for real-time analysis.

| Primers             |                                              | Sequences                     | Accession no. |
|---------------------|----------------------------------------------|-------------------------------|---------------|
| <i>qRT-NHX1-F</i>   | <i>Sodium/hydrogen exchanger 1</i>           | 5' -GCAGCTGATATCTCAAGCCA-3'   | AY296910.1    |
| <i>qRT-NHX1-R</i>   |                                              | 5' - ACTGAAGGTTTGTTCGGGGG-3'  |               |
| <i>qRT-HKT1,4-F</i> | <i>High-affinity potassium transporters</i>  | 5' - GATGCTAGCGGCAACGGT-3'    | KF443079.1    |
| <i>qRT-HKT1,4-R</i> |                                              | 5' - CGCGTTCGACACCTTCTC-3'    |               |
| <i>qRT-SOS1-F</i>   | <i>Salt overly sensitive 1</i>               | 5' - AGAGTTTCCGGAGATCCAGC-3'  | EU552490.1    |
| <i>qRT-SOS1-R</i>   |                                              | 5' - TGCTGCCATACATGCTGACT-3'  |               |
| <i>qRT-CAT-F</i>    | <i>Catalase</i>                              | 5' -CGAGAAGATGGTGATCGAGA-3'   | KP696753.1    |
| <i>qRT-CAT-R</i>    |                                              | 5' -TGTTGATGAATCGCTCTTGC-3'   |               |
| <i>qRT-SOD-F</i>    | <i>Superoxide dismutase</i>                  | 5' -GCCATTGATGAGGATTTTGG-3'   | KP696754.1    |
| <i>qRT-SOD-R</i>    |                                              | 5' -CAAAGCTAGCCACACCCATC-3'   |               |
| <i>qCDC-F</i>       | <i>Cell division control protein</i>         | 5' -GCCTGGTAGTCGCAGGAGGAT-3'  | Ta54227       |
| <i>qCDC-R</i>       |                                              | 5' -ATGTCTGGCCTGTTGGTAGC-3'   |               |
| <i>qGA20ox1-F</i>   | <i>Gibberellin20 oxidase 1</i>               | 5' -CGCCTACCCGGACTTCAC-3'     | XM_037588783  |
| <i>qGA20ox1-R</i>   |                                              | 5' -TAAGTAAGTCATGTCCTGGCGG-3' |               |
| <i>qGA3ox1-F</i>    | <i>Gibberellin3-beta-dioxygenase 1</i>       | 5' - TTCTACAACCCGGCGTTCG-3'   | XM_037599618  |
| <i>qGA3ox1-R</i>    |                                              | 5' - TGCCTTTGGCGCCTTGAC-3'    |               |
| <i>qNRT1.1-F</i>    | <i>Nitrate transporter 1.1</i>               | 5' -GGAGGCTCGACTACTTCTAC-3'   | XM_037555884  |
| <i>qNRT1.1-R</i>    |                                              | 5' -ATCATGGCCTCCTCGTCAG-3'    |               |
| <i>qNRT2.1-F</i>    | <i>High-affinity nitrate transporter 2.1</i> | 5' - CCGGCCAAAAGTTTGCTGAG-3'  | XM_037589359  |
| <i>qNRT2.1-R</i>    |                                              | 5' - ATACGTGCTGGGGCGTATTG-3'  |               |
| <i>qGS-F</i>        | <i>Glutamine synthetase</i>                  | 5' - GAGACCGCCGACATCAACAC-3'  | XM_037569872  |
| <i>qGS-R</i>        |                                              | 5' - TCATGGAGGTGACGACGTAG-3'  |               |
